# Supplementary material for: Filtered reproductive long non-coding RNAs by genome-wide analyses of goat ovary at different estrus periods
Source: PubMed Central journal article supplement (PMC6278114; doi:10.1186/s12864-018-5268-7), 2018-12-04

**a**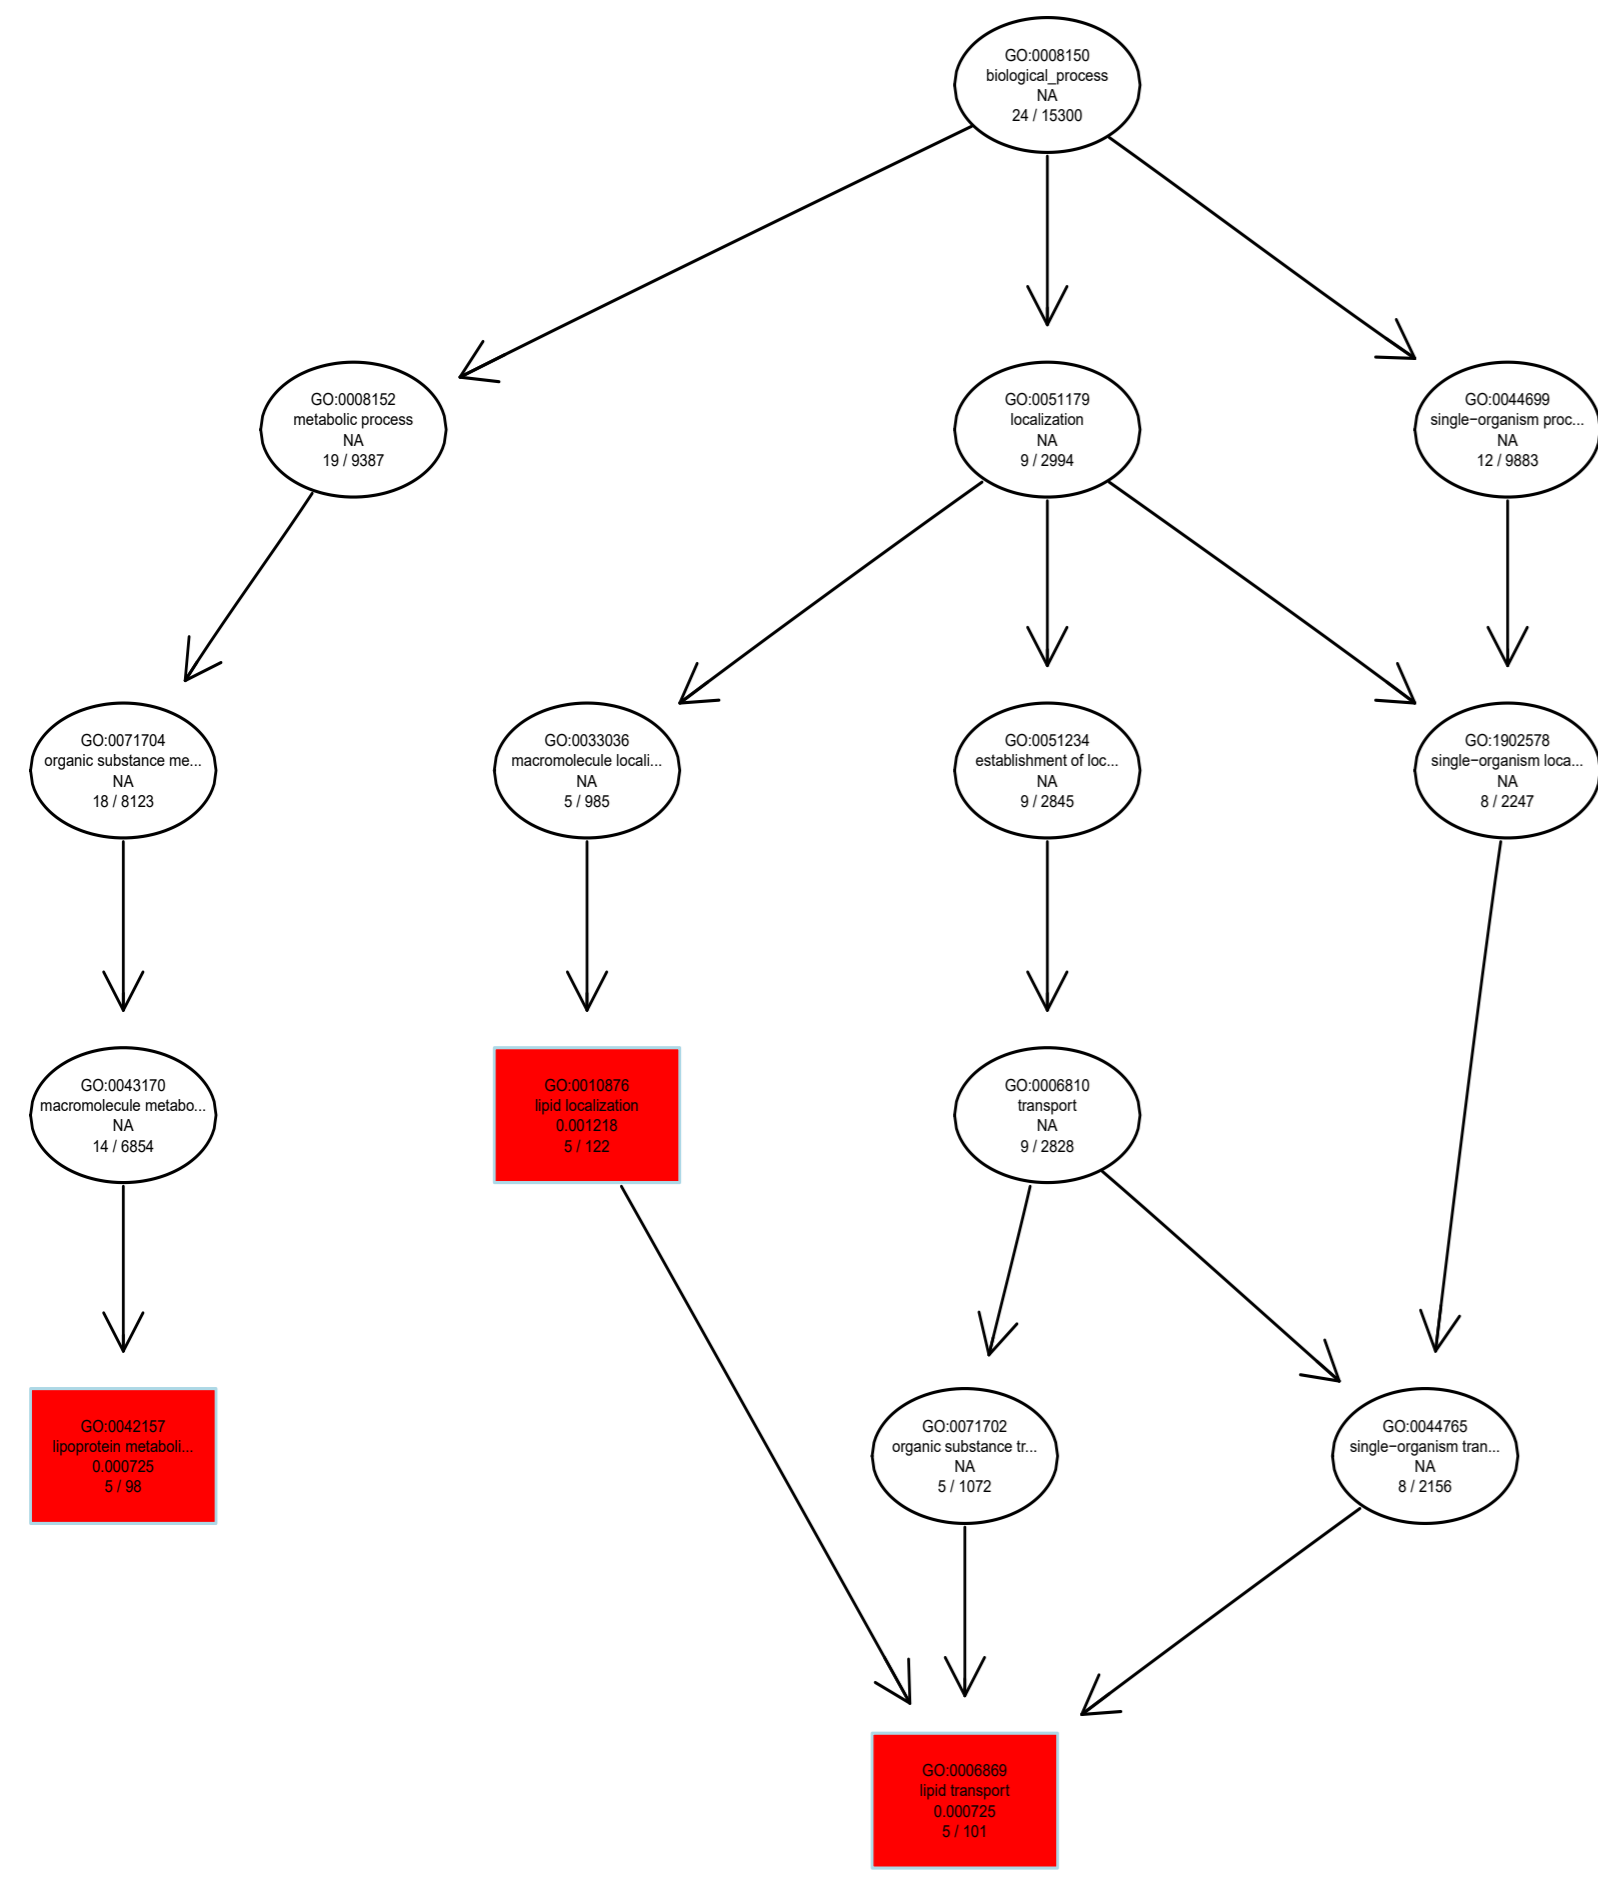**b**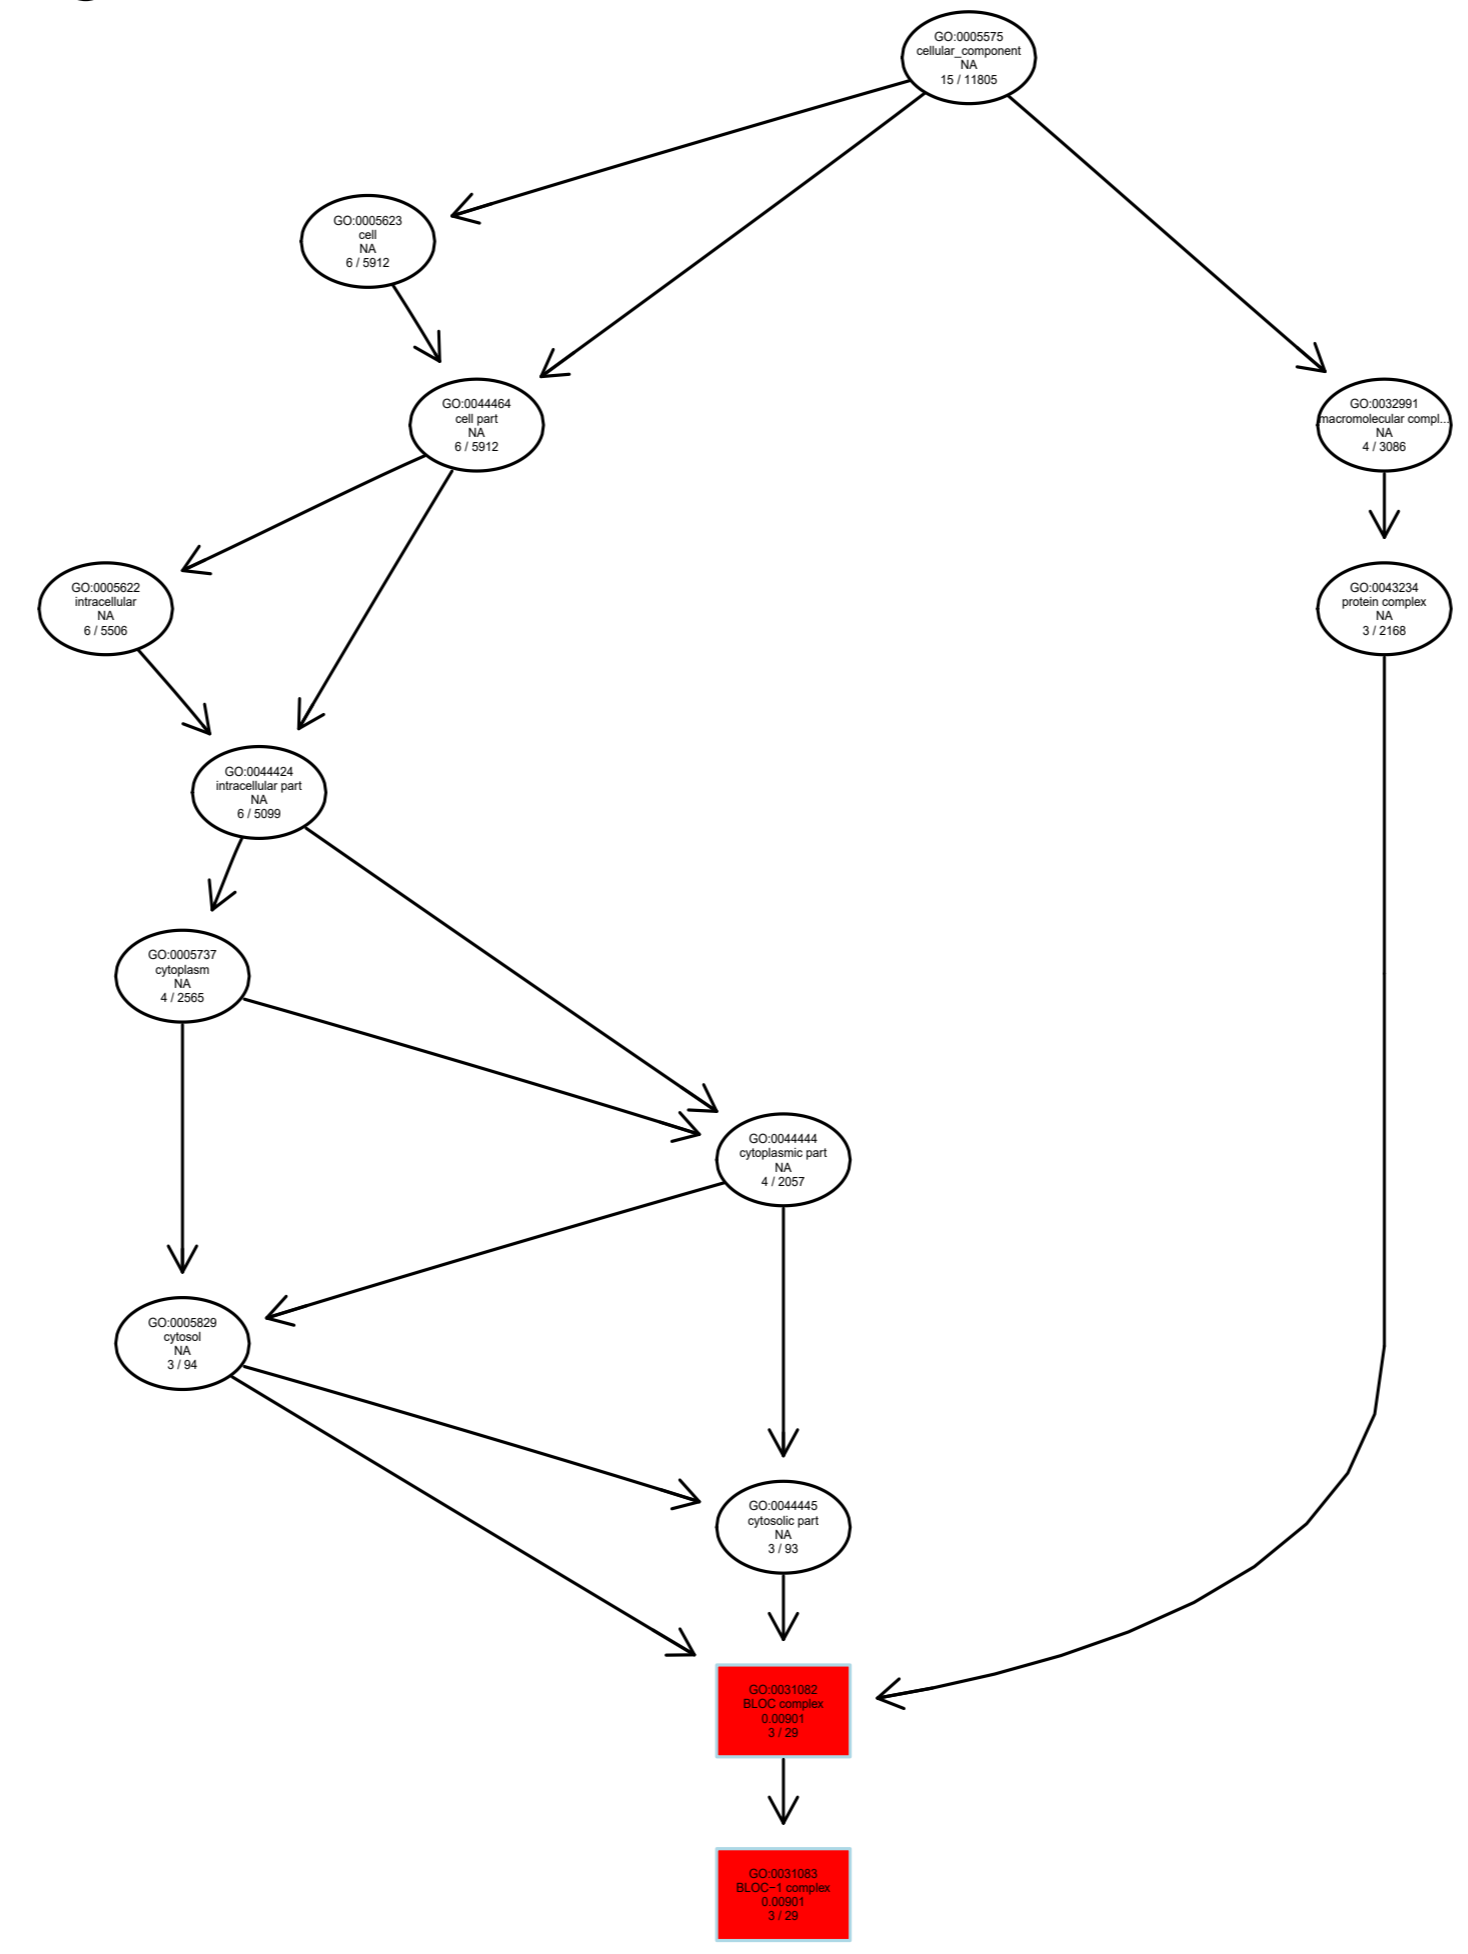**c**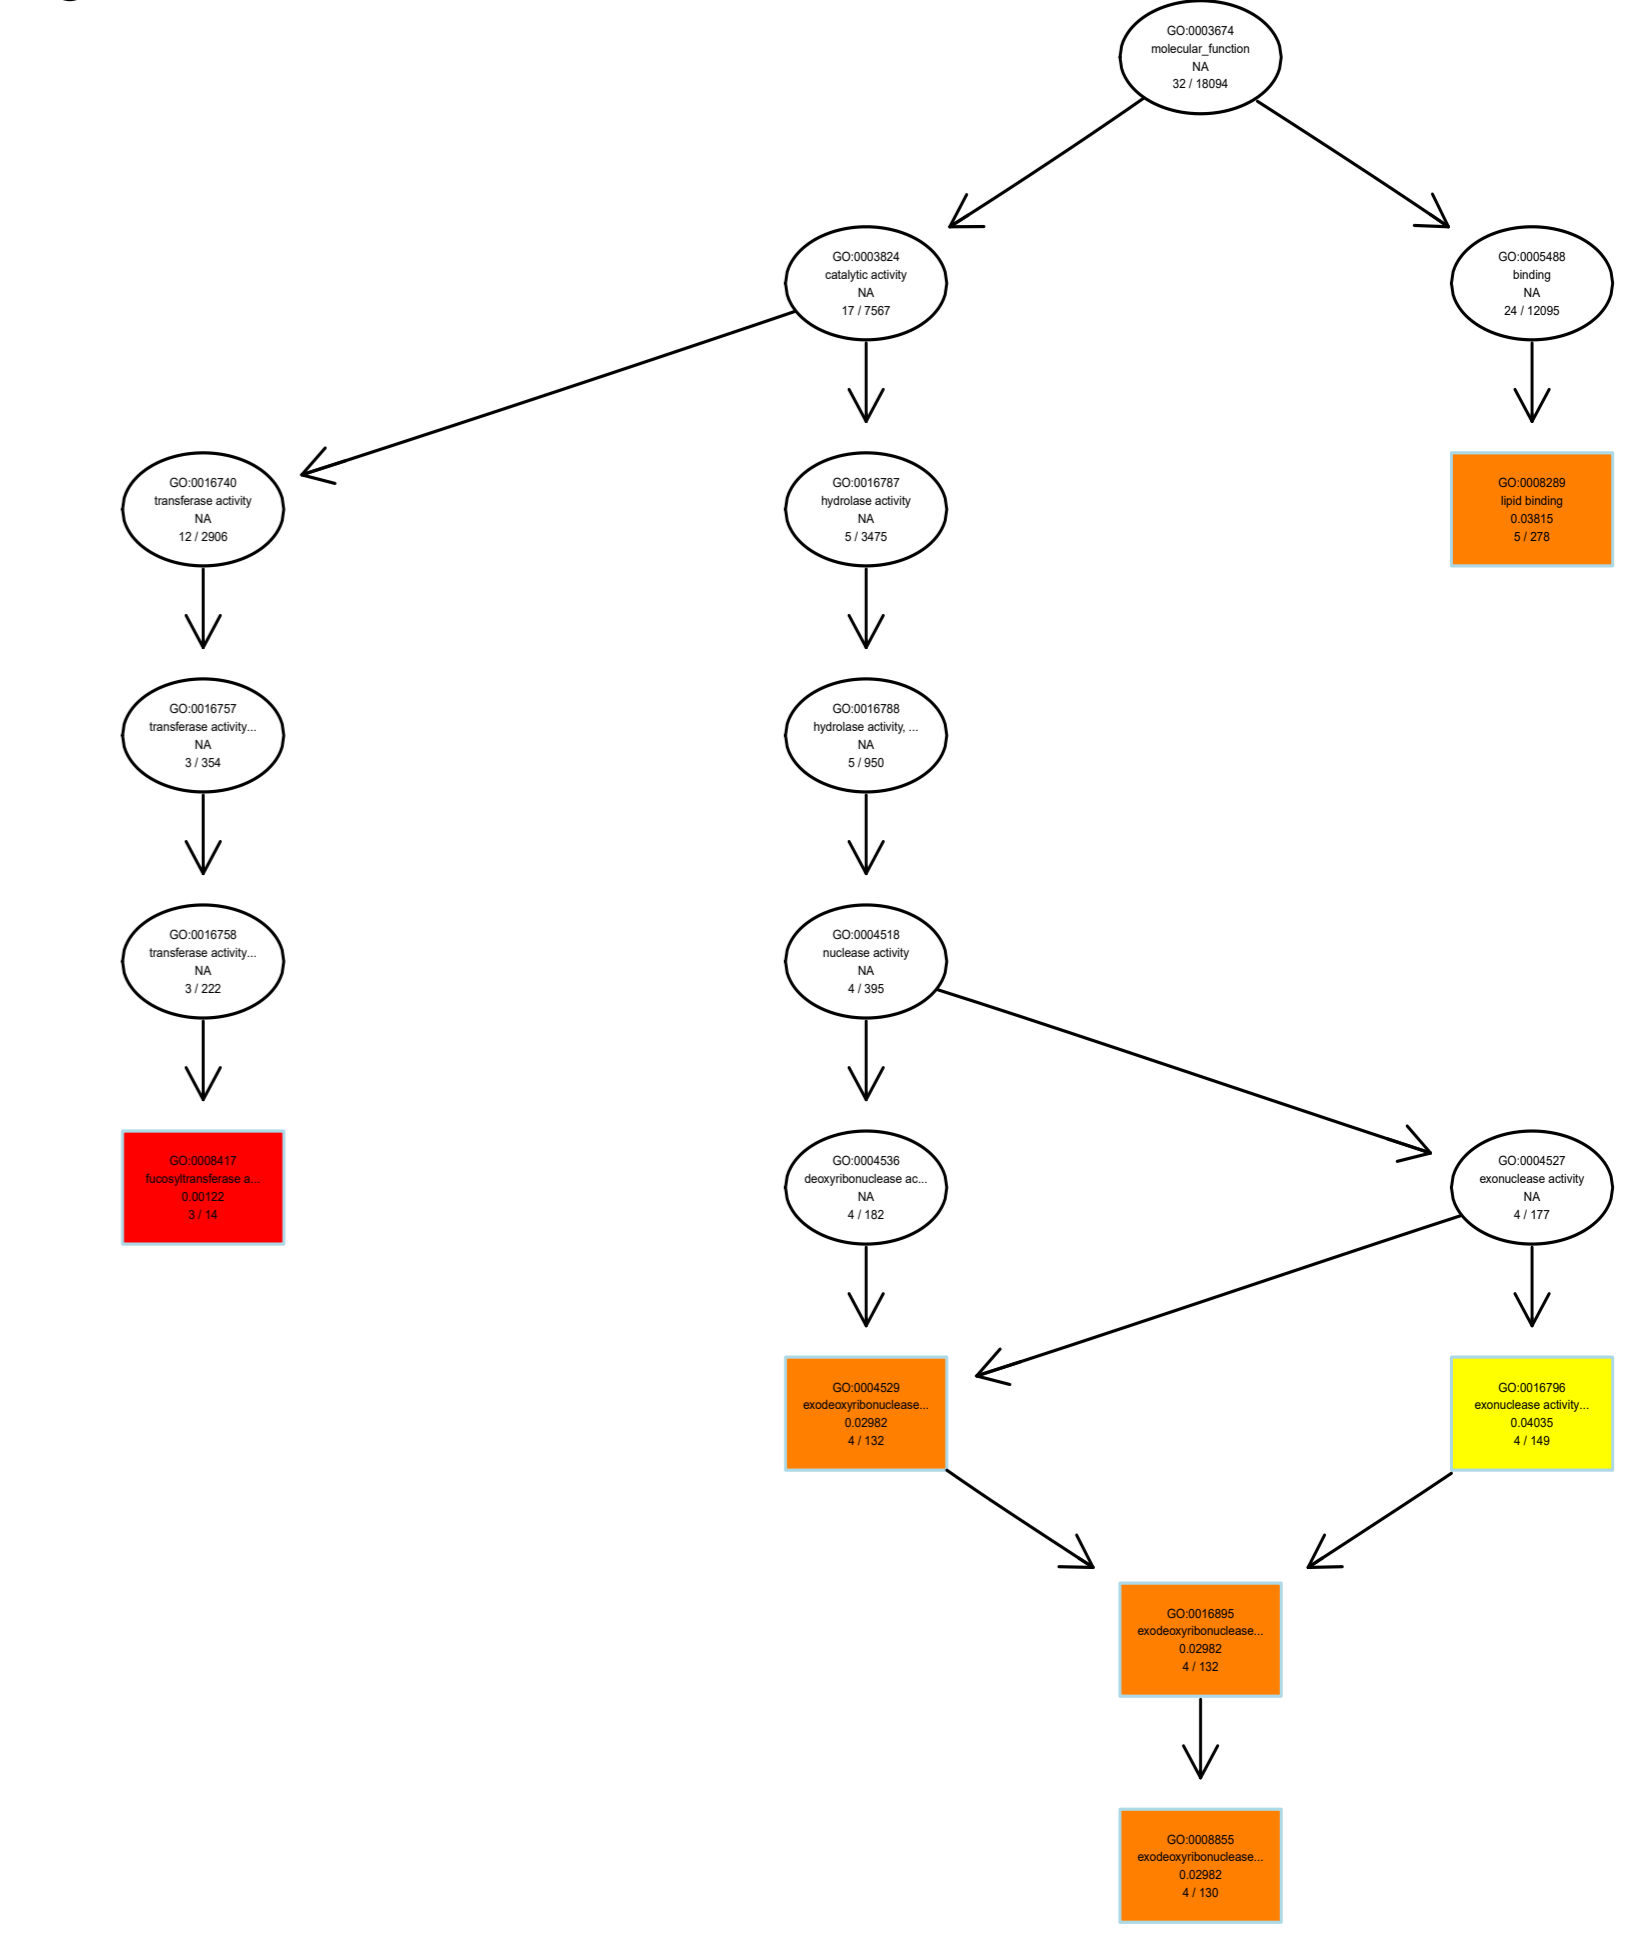**d**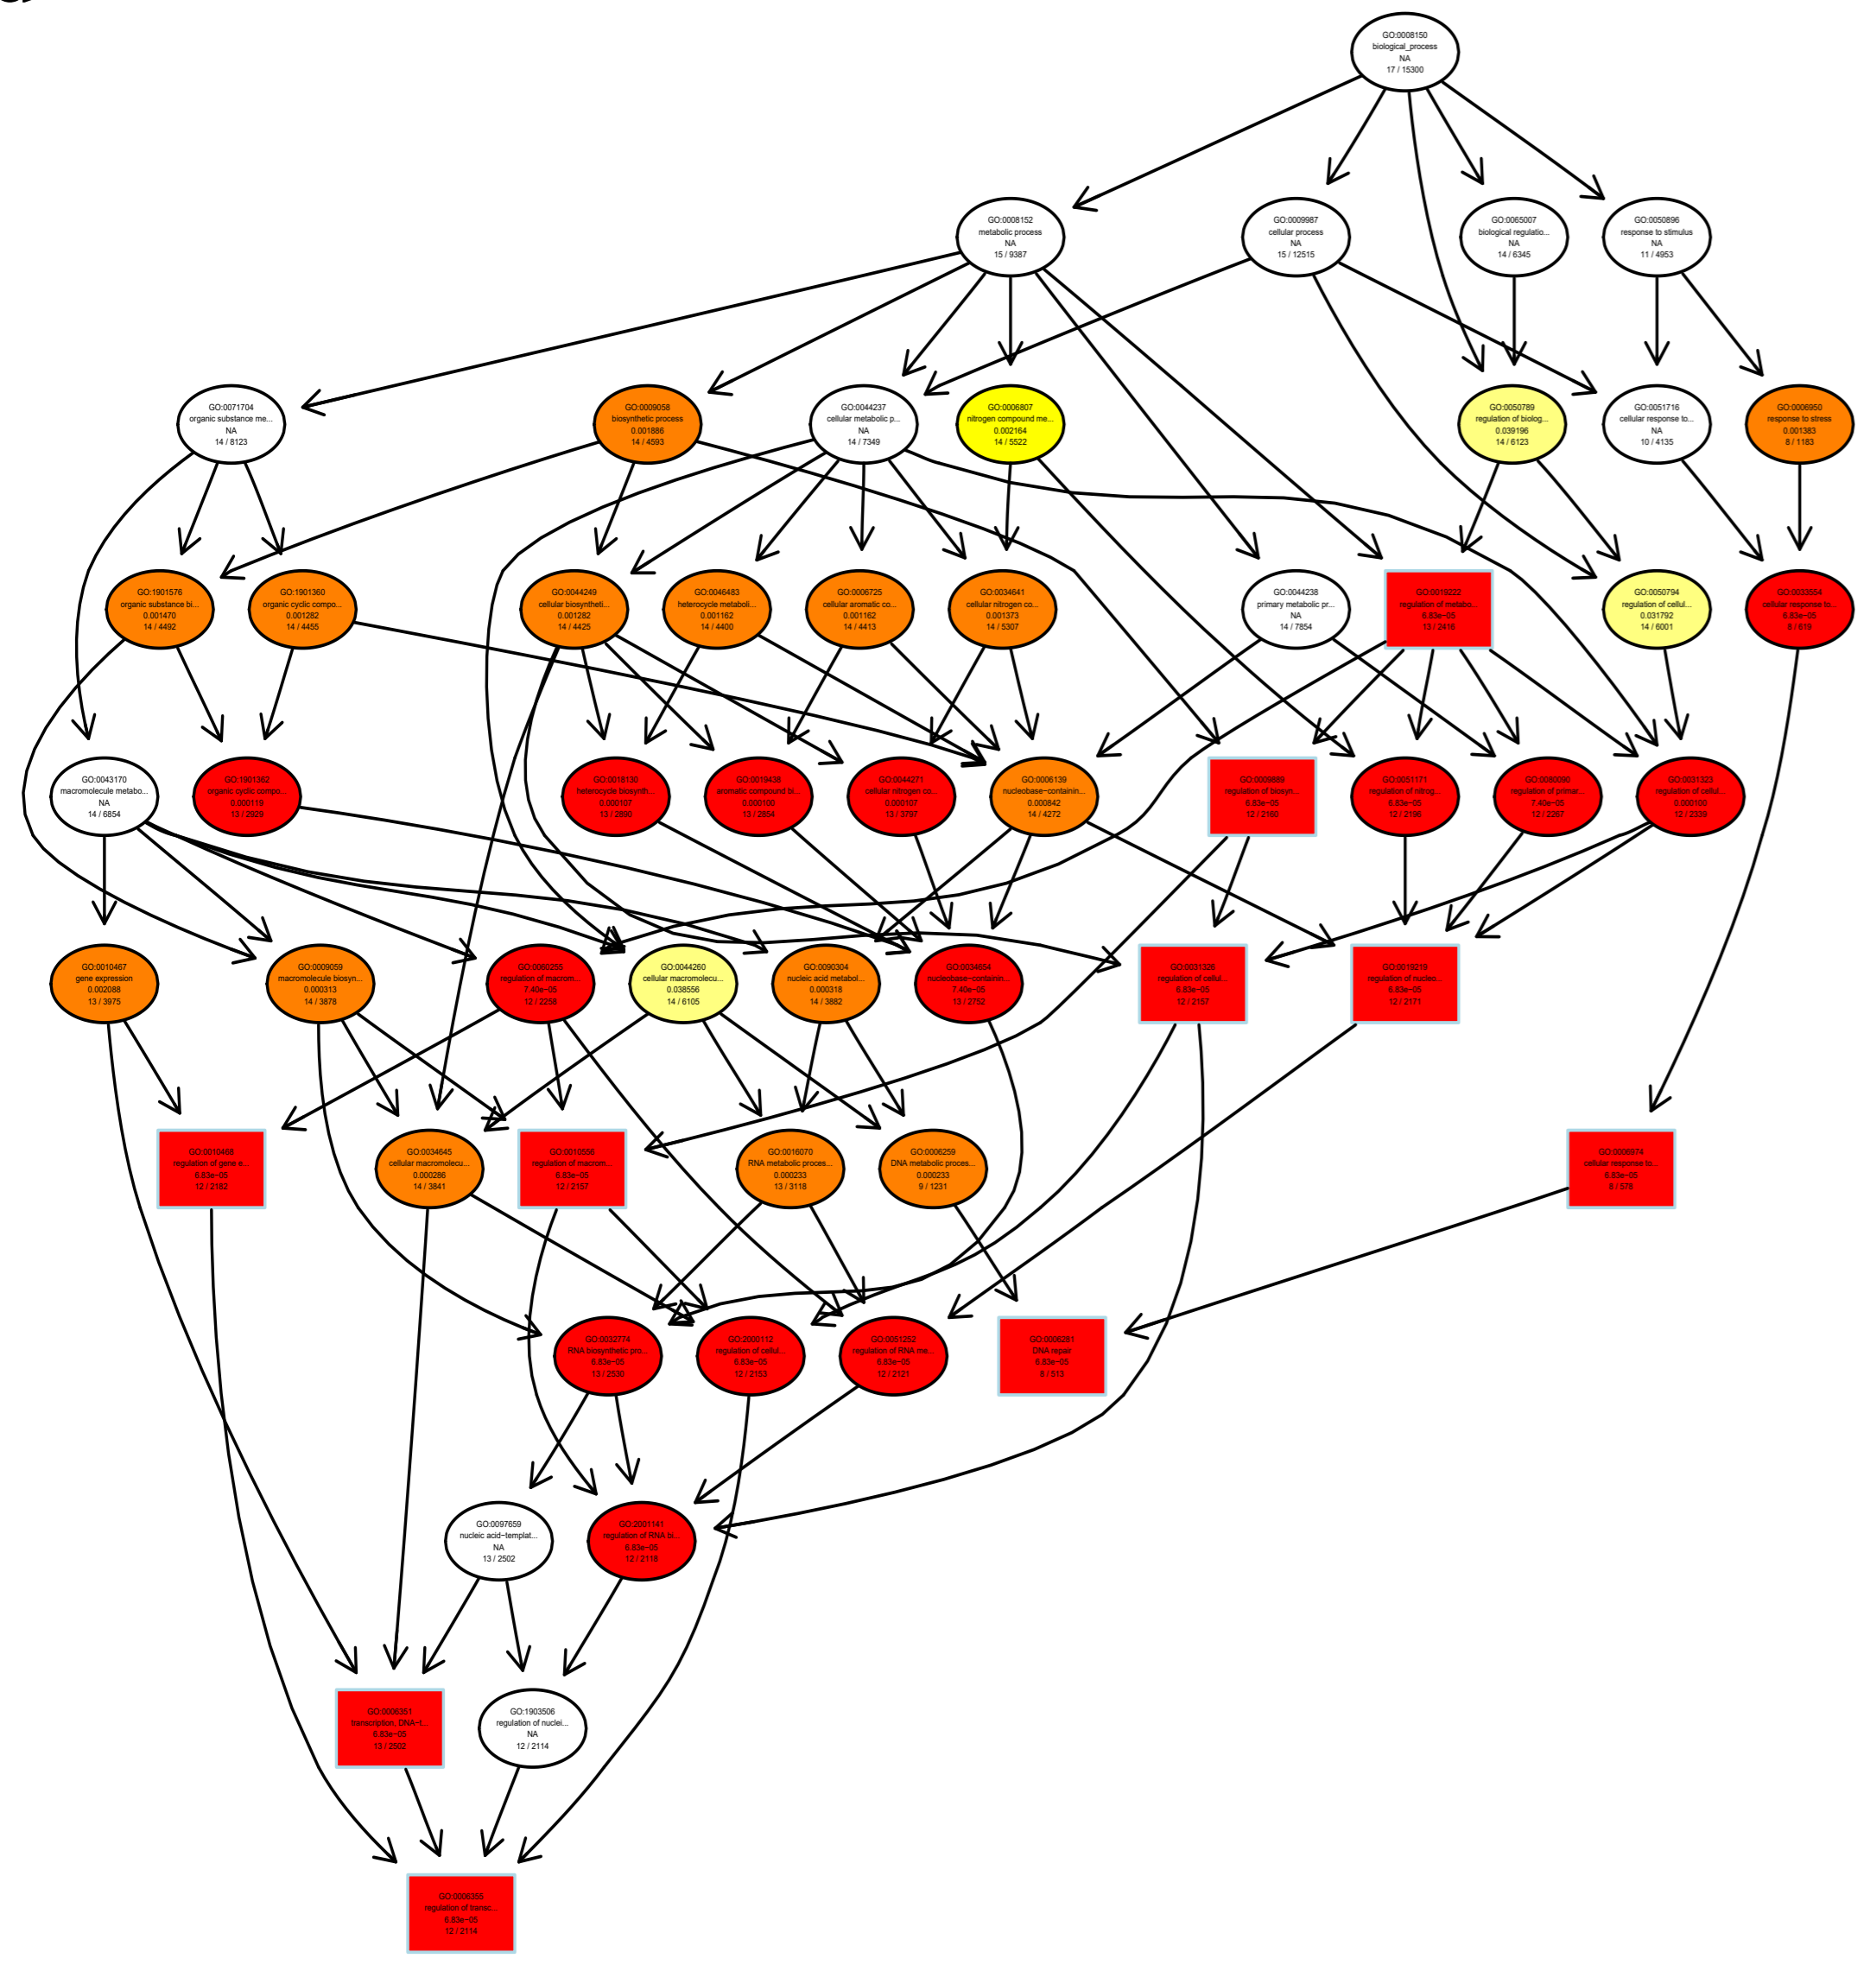**e**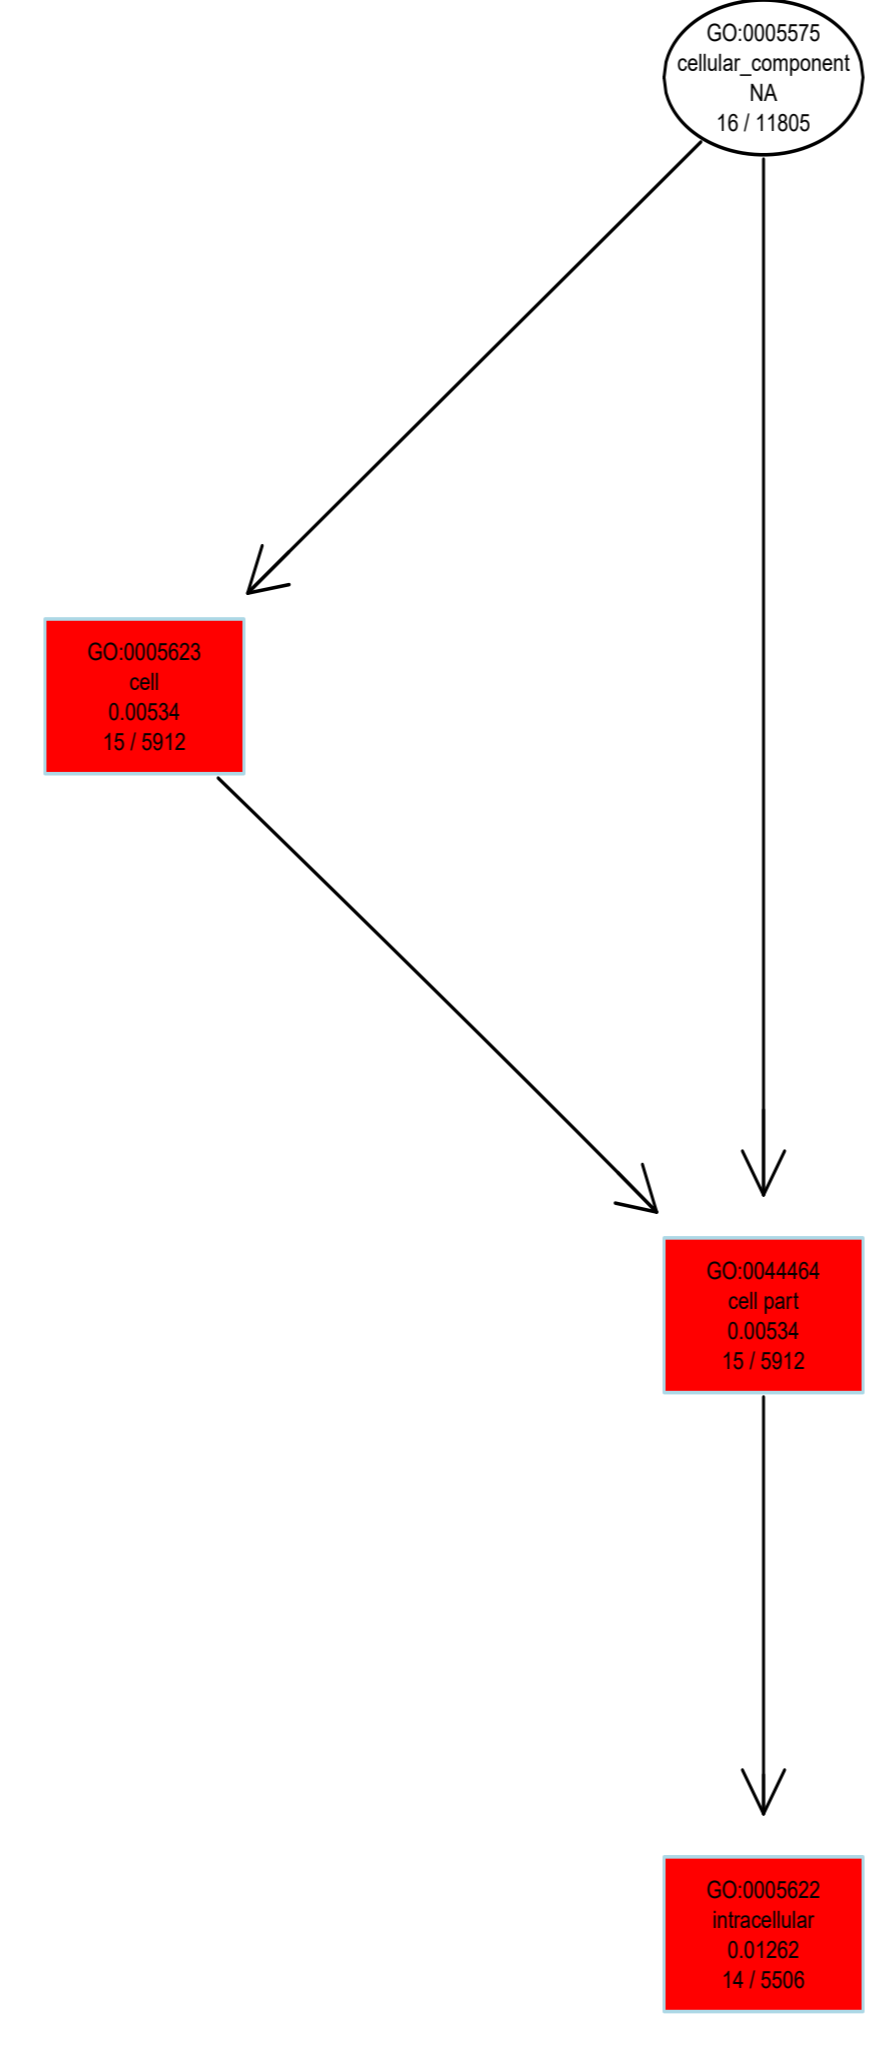**f**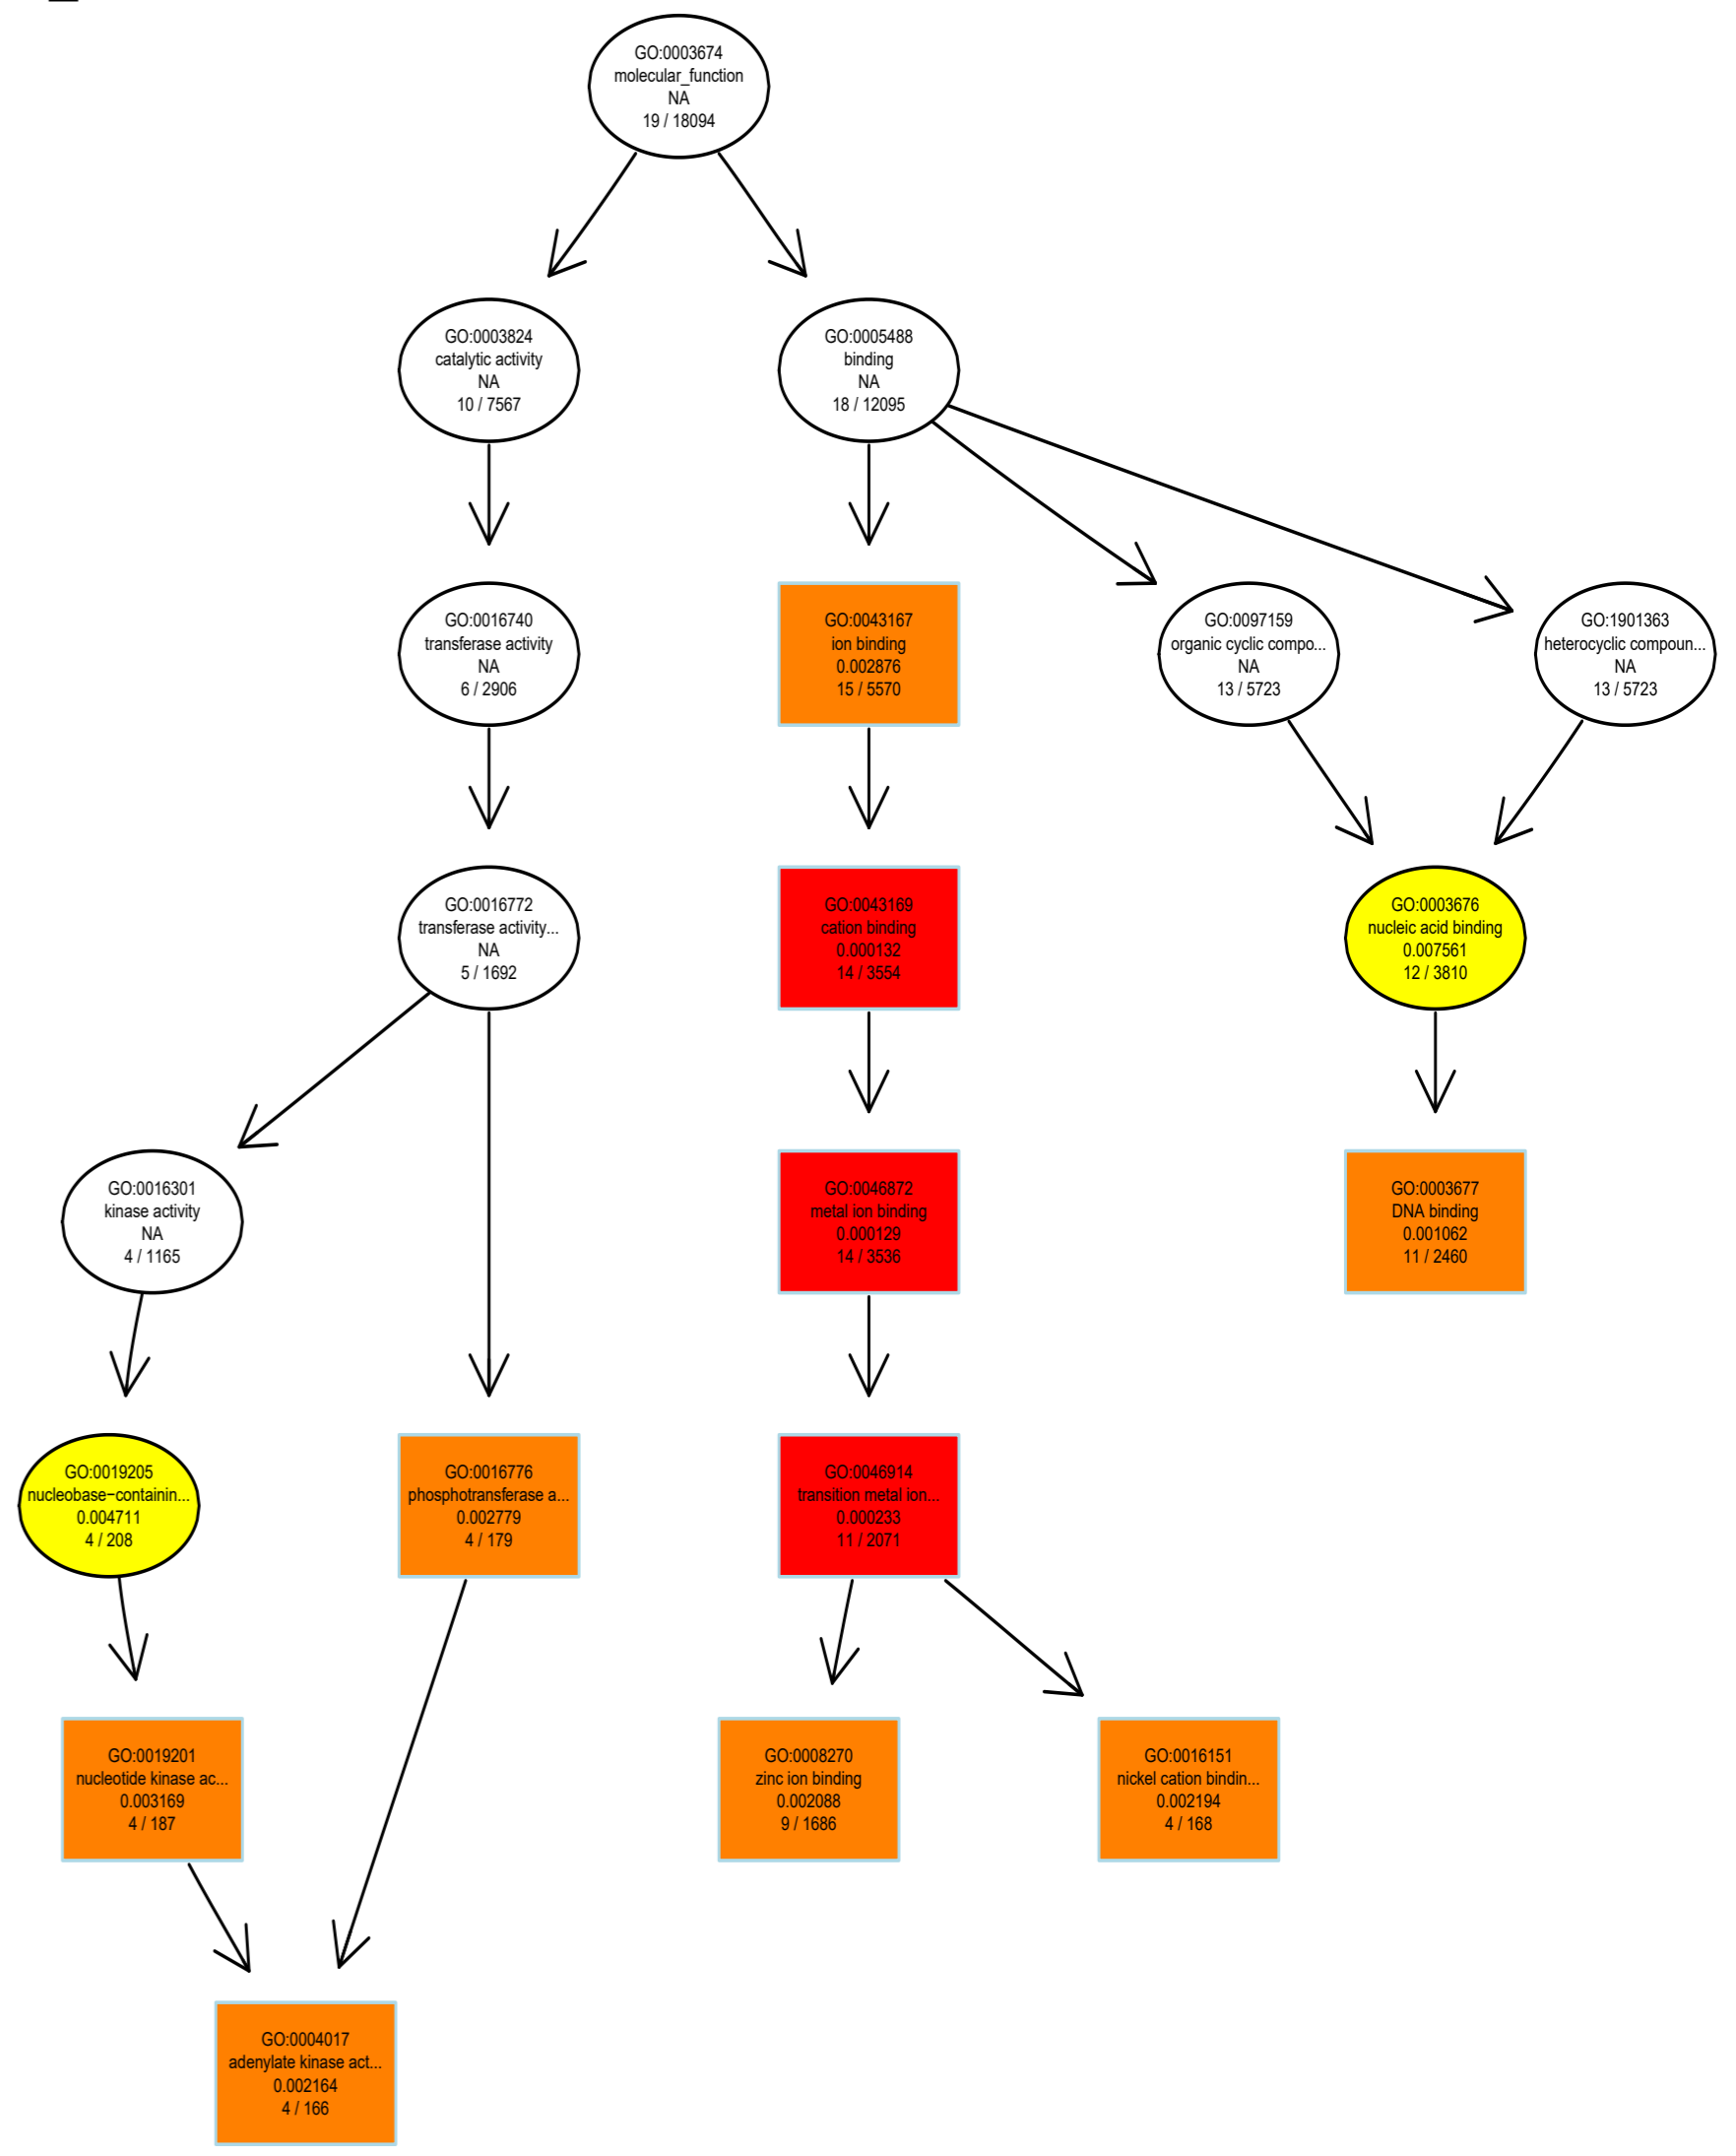

Supplement: 12864_2018_5268_MOESM4_ESM.pdf [file 12864_2018_5268_MOESM4_ESM.pdf]
